# Supplementary material
Source: Research Square preprint supplement (doi:10.21203/rs.3.rs-8971365/v1)
Supplement: Supplementary file 1 [file 44c7dbdfb65e553a84ccd9dc.pdf]

# Questionnaire: Non-prescription acquisition of antibiotics in community pharmacies in Marib, Yemen

---

## Section 1: Socio-demographic characteristics

**1. Age (years):**

.....

**2. Gender:**

- Male
- Female

**3. Locality:**

- Urban area
- Rural area

**4. Residence status:**

- Resident
- Displaced person

**5. Level of education:**

- Illiterate / can read and write
- Primary or preparatory school
- Secondary school
- University graduate or postgraduate

**6. Occupation:**

- Employed
- Unemployed

**7. Monthly family income (Yemeni Rial):**

- Low (<100,000)
- Medium (100,000–300,000)
- High (>300,000)

---

## **Section 2: Antibiotic acquisition**

### **8. Did customer buy antibiotic with a prescription?**

- Yes (with prescription)
- No (without prescription)

### **9. What was the main reason for purchasing the antibiotic?**

- Fever, common cold, or cough
  - Dysentery / diarrhea / food poisoning
  - Upper respiratory tract infection
  - Abdominal/ other pain
  - Other reason
- 

## **Section 3: Antibiotic use practices**

### **10. What do you usually do with leftover antibiotics?**

- I usually complete the full course
  - I keep it at home for future use
- 

## **Section 4: Source of information**

### **11. What source influenced your decision to purchase antibiotics without prescription?**

- Pharmacist
  - Self-Knowledge/Previous personal experience
  - Family member
  - Friends or neighbors
-
